# Supplementary material
Source: PubMed Central journal article supplement (PMC3050864)
Supplement: neo1303_0206SD1.pdf [file neo1303_0206SD1.pdf]

**Table W1.** RT-PCR Primers.

| Transcript                | Primer Sequence                                                           |
|---------------------------|---------------------------------------------------------------------------|
| Mouse P2X <sub>1</sub>    | Forward 5'-tcattgccagaggcttcc-3'<br>Reverse 5'-gtggagggttgatgtgt-3'       |
| Mouse P2X <sub>2</sub>    | Forward 5'-caaagcctatgggattcg-3'<br>Reverse 5'-cctatgaggagttctgtt-3'      |
| Mouse P2X <sub>3</sub>    | Forward 5'-gtgaaaagctggaccattgg-3'<br>Reverse 5'-gctgccattctccattctgt-3'  |
| Mouse P2X <sub>4</sub>    | Forward 5'-tacgtcattgggtgggtt-3'<br>Reverse 5'-cttgatctggatacccatga-3'    |
| Mouse P2X <sub>5</sub>    | Forward 5'-aggacattgacacttccctg-3'<br>Reverse 5'-catcaggtcacggaactcta-3'  |
| Mouse P2X <sub>6</sub>    | Forward 5'-gtggtagtctacgtatagg-3'<br>Reverse 5'-gcctctctatcacatacag-3'    |
| Mouse P2X <sub>7</sub>    | Forward 5'-cttgccaactatgaacgg-3'<br>Reverse 5'-cttggcctttgccaactt-3'      |
| Mouse P2Y <sub>1</sub>    | Forward 5'-ttatgtcagcgtgctggtgt-3'<br>Reverse 5'-cgtgtctccattctgctga-3'   |
| Mouse P2Y <sub>2</sub>    | Forward 5'-gaggacttcaagtacgtct-3'<br>Reverse 5'-acggagctgaagccacaaa-3'    |
| Mouse P2Y <sub>4</sub>    | Forward 5'-aacaactgcttccctccct-3'<br>Reverse 5'-aagtcctagagtaggtg-3'      |
| Mouse P2Y <sub>6</sub>    | Forward 5'-cctgatgtatgctgttccac-3'<br>Reverse 5'-cacagccaagtaggctgtct-3'  |
| Human P2Y <sub>11</sub> * | Forward 5'-ttrggccatactgtrgttgag-3'<br>Reverse 5'-gagaagggtgcacgatccca-3' |
| Mouse P2Y <sub>12</sub>   | Forward 5'-atatgctggtgtcaacacc-3'<br>Reverse 5'-ggatccctgcaagtgga-3'      |
| Mouse P2Y <sub>13</sub>   | Forward 5'-tgcaggcttcaacaagtct-3'<br>Reverse 5'-cctttccccatctcacat-3'     |
| Mouse P2Y <sub>14</sub>   | Forward 5'-ggaacacctgatcacaag-3'<br>Reverse 5'-tgaccttccgtctgactctt-3'    |
| Mouse actin               | Forward 5'-tgtactagccatccagct-3'<br>Reverse 5'-ggtaccaccagacaactgt-3'     |

\*Human P2Y<sub>11</sub> was used as a negative control as mouse cells do not express P2Y<sub>11</sub> receptor.

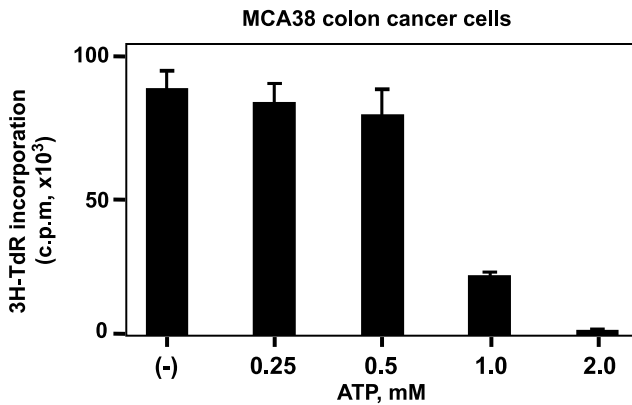

**Figure W1.** Effects of extracellular ATP on colon cancer cell proliferation. Extracellular ATP inhibited proliferation of colon cancer cells, in a dose-dependent manner. MCA38 cells were treated with ATP at the indicated concentrations for 16 hours. Cell proliferation was determined by <sup>3</sup>H-TdR incorporation assay. Columns indicate mean of triplicate determinations; bars, SD.

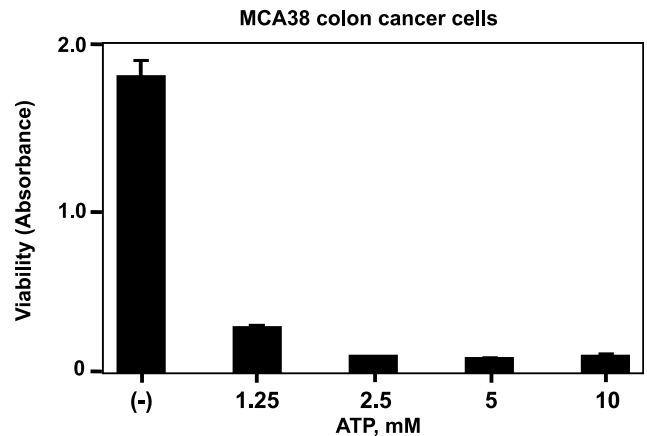

**Figure W2.** Effects of extracellular ATP on viability of colon cancer cells. Extracellular ATP exhibited cytotoxicity on colon cancer cells in a dose-dependent manner. MCA38 cells were treated with ATP at the indicated concentrations for 16 hours, and cell viability was evaluated using Cell Counting Kit-8. Columns indicate mean of triplicate determinations; bars, SD.

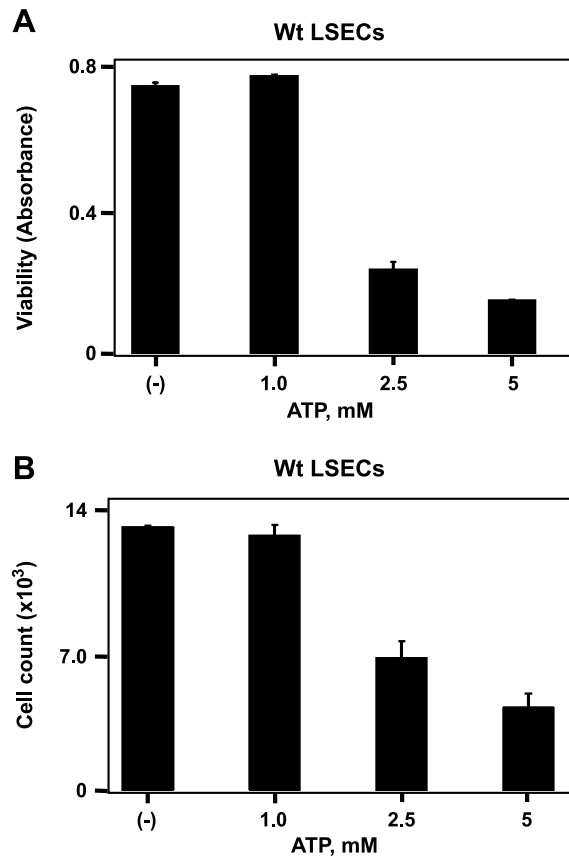

**Figure W3.** Effects of extracellular ATP on growth of wt LSECs. Extracellular ATP exhibited inhibitory effects on wt LSECs in a dose-dependent manner. Freshly purified wt LSECs were cultured for 24 hours before being exposed to ATP at the indicated concentrations for additional 16 hours. (A) Cell viability was evaluated using Cell Counting Kit-8. (B) Cells were counted using the Celigo Cell Counting application. Columns indicate mean of triplicate determinations; bars, SD.

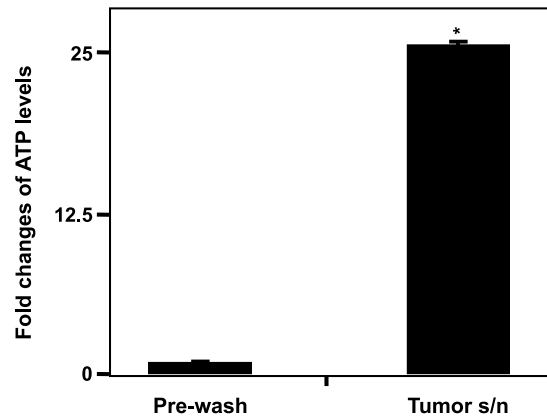

**Figure W4.** Release of ATP by damaged tumor cells. Extracellular ATP levels in prewash media (Pre-wash) and tumor supernatants (Tumor s/n) were measured using the ATP Colorimetric/Fluorometric Assay Kit (BioVision) and expressed as fold changes to the prewash medium. Columns indicate mean of triplicate determinations; bars, SD. \* $P = 3.6e - 08$ .
